# Supplementary material for: Improved Characterization of Circulating Tumor Cells and Cancer-Associated Fibroblasts in One-Tube Assay in Breast Cancer Patients Using Imaging Flow Cytometry
Source: Cancers (Basel). 2023 Aug 18;15(16):4169. doi: 10.3390/cancers15164169 (PMC10453498; doi:10.3390/cancers15164169)
Supplement: Supplementary file 1 [file cancers-15-04169-s001.zip]

Archive with 4 entries (4 files):
- Supplementary Figure S1.pdf
- Supplementary Figure S2.pdf
- Supplementary Figure S3.pdf
- Supplementary Table.pdf
