# Supplementary material for: Improved Characterization of Circulating Tumor Cells and Cancer-Associated Fibroblasts in One-Tube Assay in Breast Cancer Patients Using Imaging Flow Cytometry
Source: Cancers (Basel). 2023 Aug 18;15(16):4169. doi: 10.3390/cancers15164169 (PMC10453498; doi:10.3390/cancers15164169)
Supplement: Supplementary file 1 [file cancers-15-04169-s001.zip › Supplementary Table.pdf]

**Supplementary Table S1**

Antibodies dilution and acquisition parameters used for ImFC.

| <b>Antibody</b>          | <b>Company</b>              | <b>Cat. nr.</b> | <b>Fluorophor</b> | <b>Dilution</b> | <b>Laser</b> | <b>Laser power</b> | <b>Channel</b> |
|--------------------------|-----------------------------|-----------------|-------------------|-----------------|--------------|--------------------|----------------|
| BF                       |                             |                 |                   |                 |              |                    | 1+9            |
| pan-keratin<br>(AE1/AE3) | Thermo Fisher<br>Scientific | 53-9003-82      | Alexa 488         | 1:2500          | 488          | 100mW              | 2              |
| Pan-keratin<br>(C11)     | Thermo Fisher<br>Scientific | MA5-18156       | Alexa 488         | 1:2500          | 488          | 100mW              | 2              |
| a-SMA (1A4)              | R&Dsystems                  | IC1420P         | PE                | 1:50            | 488          | 100mW              | 3              |
| SSC                      |                             |                 |                   |                 | 785          |                    | 6              |
| DAPI                     | BD Biosciences              | 564907          | DAPI              | 0,04ug/ml       | 405          | 100mW              | 7              |
| CD29<br>(TS2/16)         | Thermo Fisher<br>Scientific | 63-0299-42      | SuperBright600    | 1:1000          | 405          | 100mW              | 10             |
| Vimentin<br>(D21H3)      | Cell Signaling              | 9856            | Alexa 647         | 1:100           | 647          | 150mW              | 11             |
| CD45<br>(REA747)         | Miltenyi Biotec             | 130-110-635     | APC-Vio770        | 1:50            | 647          | 150mW              | 12             |
| CD31 (WM59)              | BioLegend                   | 303120          | APC-Cy7           | 1:10            | 647          | 150mW              | 12             |

**Supplemental Table S2**

Correlations of CTC phenotypes with cCAFs.

|                     |                                 | epi CTCs     | epi-mes CTCs           | mes CTCs                                       | neg CTCs                                       | cCAFs                                          |
|---------------------|---------------------------------|--------------|------------------------|------------------------------------------------|------------------------------------------------|------------------------------------------------|
| <b>epi CTCs</b>     | R <sup>2</sup><br>p-values<br>n | 1<br><br>210 | -0.015<br>0.813<br>210 | <b>0.259</b><br><b>&lt;0.001</b><br><b>210</b> | <b>0.772</b><br><b>&lt;0.001</b><br><b>210</b> | <b>0.165</b><br><b>0.017</b><br><b>210</b>     |
| <b>epi-mes CTCs</b> | R <sup>2</sup><br>p-values<br>n |              | 1<br><br>210           | 0.086<br>0.215<br>210                          | 0.105<br>0.128<br>210                          | 0.086<br>0.214<br>210                          |
| <b>mes CTCs</b>     | R <sup>2</sup><br>p-values<br>n |              |                        | 1<br><br>210                                   | <b>0.314</b><br><b>&lt;0.001</b><br><b>210</b> | 0.097<br>0.163<br>210                          |
| <b>neg CTCs</b>     | R <sup>2</sup><br>p-values<br>n |              |                        |                                                | 1<br><br>210                                   | <b>0.250</b><br><b>&lt;0.001</b><br><b>210</b> |
| <b>cCAFs</b>        | R <sup>2</sup><br>p-values<br>n |              |                        |                                                |                                                | 1<br><br>210                                   |

### Supplementary Table S3

Comparison of exclusive CTC phenotypes among clinico-pathological features and response to treatment of patients with breast cancer. Chi squared test was performed.

Due to missing data not all numbers sum up to 210.

|                              |            | Exclusive CTC phenotypes |            |           |          |                  |             |
|------------------------------|------------|--------------------------|------------|-----------|----------|------------------|-------------|
| Variable                     | total<br>n | epi                      | mes        | epi-mes   | neg      | heterogeno<br>us | p-value     |
| <b>Age</b>                   |            |                          |            |           |          |                  |             |
| <50                          | 16         | 2 (18.2%)                | 2 (12.5%)  | 2 (66.7%) | 0 (0%)   | 10 (43.5%)       | <b>0.02</b> |
| >>50                         | 42         | 9 (81.8%)                | 14 (87.5%) | 1 (33.3%) | 5 (100%) | 13 (56.5%)       |             |
| <b>cT stage</b>              |            |                          |            |           |          |                  |             |
| cT1-2                        | 27         | 5 (62.5%)                | 8 (72.7%)  | 2 (100%)  | 2 (50%)  | 10 (66.7%)       | 0.8         |
| cT3-4                        | 13         | 3 (37.5%)                | 3 (27.3%)  | 0 (0%)    | 2 (50%)  | 5 (33.3%)        |             |
| <b>cN stage</b>              |            |                          |            |           |          |                  |             |
| 0                            | 15         | 5 (62.5%)                | 4 (40%)    | 2 (100%)  | 0 (0%)   | 4 (25%)          | 0.11        |
| 1                            | 25         | 3 (37.5%)                | 6 (60%)    | 0 (0%)    | 4 (100%) | 12 (75%)         |             |
| <b>M stage</b>               |            |                          |            |           |          |                  |             |
| 0                            | 46         | 7 (63.6%)                | 12 (75%)   | 3 (100%)  | 5 (100%) | 19 (82.6%)       | 0.05        |
| 1                            | 12         | 4 (36.4%)                | 4 (25%)    | 0 (0%)    | 0 (0%)   | 4 (15.4%)        |             |
| <b>Grading</b>               |            |                          |            |           |          |                  |             |
| 1                            | 3          | 1 (11.1%)                | 1 (8.3%)   | 0 (0%)    | 0 (0%)   | 1 (5%)           | 0.46        |
| 2                            | 26         | 3 (33.3%)                | 7 (58.3%)  | 3 (100%)  | 4 (100%) | 9 (45 %)         |             |
| 3                            | 19         | 5 (55.6%)                | 4 (33.3%)  | 0 (0%)    | 0 (0%)   | 10 (50%)         |             |
| <b>Molecular type</b>        |            |                          |            |           |          |                  |             |
| Luminal A                    | 9          | 1 (10%)                  | 4 (25%)    | 1 (33.3%) | 1 (25%)  | 2 (8.7%)         | 0.1         |
| Luminal B HER2-              | 14         | 1 (10%)                  | 4 (25%)    | 2 (66.7%) | 0 (0%)   | 7 (30.4%)        |             |
| Luminal B HER2+              | 13         | 2 (20%)                  | 4 (25%)    | 0 (0%)    | 3 (75%)  | 4 (17.4%)        |             |
| Non luminal HER2+            | 3          | 0 (0%)                   | 1 (6.3%)   | 0 (0%)    | 0 (0%)   | 2 (8.7%)         |             |
| Triple Negative              | 17         | 6 (60%)                  | 3 (18.8%)  | 0 (0%)    | 0 (0%)   | 8 (34.8%)        |             |
| <b>Response to treatment</b> |            |                          |            |           |          |                  |             |
| stable disease               | 6          | 0 (0%)                   | 2 (25%)    | 1 (100%)  | 2 (50%)  | 1 (8.3%)         | 0.45        |
| complete response            | 9          | 2 (50%)                  | 1 (12.5%)  | 0 (0%)    | 1 (25%)  | 5 (41.7%)        |             |
| partial response             | 13         | 2 (50%)                  | 5 (62.5%)  | 0 (0%)    | 1 (25%)  | 5 (41.7%)        |             |
| progressive disease          | 1          | 0 (0%)                   | 0 (0%)     | 0 (0%)    | 0 (0%)   | 1 (8.3%)         |             |

## Supplementary Table S4

Distribution of dominant CTC phenotypes among clinico-pathological features and response to treatment of patients with breast cancer. Chi squared test was performed.

Due to missing data not all numbers sum up to 210.

| Variable                     | total n | Dominant CTC phenotypes |            |           |           |              | p-value     |
|------------------------------|---------|-------------------------|------------|-----------|-----------|--------------|-------------|
|                              |         | epi                     | mes        | epi-mes   | neg       | heterogenous |             |
| <b>Age</b>                   |         |                         |            |           |           |              |             |
| <50                          | 16      | 6 (27.3%)               | 3 (17.6%)  | 4 (66.7%) | 2 (20%)   | 1 (33.3%)    | 0.08        |
| >>50                         | 42      | 16 (73.7%)              | 14 (82.4%) | 2 (33.3%) | 8 (80%)   | 2 (66.7%)    |             |
| <b>cT stage</b>              |         |                         |            |           |           |              |             |
| cT1-2                        | 27      | 10 (71.4%)              | 8 (66.7%)  | 3 (100%)  | 4 (50%)   | 2 (66.7%)    | 0.65        |
| cT3-4                        | 13      | 4 (28.6%)               | 4 (33.3%)  | 0 (0%)    | 4 (50%)   | 1 (33.3%)    |             |
| <b>cN stage</b>              |         |                         |            |           |           |              |             |
| 0                            | 15      | 6 (40%)                 | 4 (36.4%)  | 2 (66.7%) | 2 (25%)   | 1 (33.3%)    | 0.88        |
| 1                            | 25      | 9 (60%)                 | 7 (63.6%)  | 1 (33.3%) | 6 (75%)   | 2 (66.7%)    |             |
| <b>M stage</b>               |         |                         |            |           |           |              |             |
| 0                            | 46      | 16 (72.7%)              | 13 (76.5%) | 4 (66.7%) | 10 (100%) | 3 (100%)     | <b>0.03</b> |
| 1                            | 12      | 6 (23.1%)               | 4 (23.5%)  | 2 (33.3%) | 0 (0%)    | 0 (0%)       |             |
| <b>Grading</b>               |         |                         |            |           |           |              |             |
| 1                            | 3       | 2 (11.1%)               | 1 (7.7%)   | 0 (0%)    | 0 (0%)    | 0 (0%)       | 0.84        |
| 2                            | 26      | 8 (44.4%)               | 7 (53.8%)  | 4 (80%)   | 6 (66.7%) | 1 (33.3%)    |             |
| 3                            | 19      | 8 (44.4%)               | 5 (38.5%)  | 1 (20%)   | 3 (33.3%) | 2 (66.7%)    |             |
| <b>Molecular type</b>        |         |                         |            |           |           |              |             |
| Luminal A                    | 9       | 2 (9.5%)                | 4 (23.5%)  | 1 (16.7%) | 2 (22.2%) | 0 (0%)       | 0.17        |
| Luminal B HER2-              | 14      | 4 (19%)                 | 4 (23.5%)  | 3 (50%)   | 1 (11.1%) | 2 (66.7%)    |             |
| Luminal B HER2+              | 13      | 3 (14.3%)               | 4 (23.5%)  | 2 (33.3%) | 4 (44.4%) | 0 (0%)       |             |
| Non luminal HER2+            | 3       | 1 (4.8%)                | 1 (5.9%)   | 0 (0%)    | 1 (11.1%) | 0 (0%)       |             |
| Triple Negative              | 17      | 11 (52.4%)              | 4 (23.5%)  | 0 (0%)    | 1 (11.1%) | 1 (33.3%)    |             |
| <b>Response to treatment</b> |         |                         |            |           |           |              |             |
| stable disease               | 6       | 0 (0%)                  | 2 (25%)    | 2 (100%)  | 2 (28.6%) | 0 (0%)       | 0.19        |
| complete response            | 9       | 4 (44.4%)               | 1 (12.5%)  | 0 (0%)    | 3 (42.9%) | 1 (33.3%)    |             |
| partial response             | 13      | 4 (44.4%)               | 5 (62.5%)  | 0 (0%)    | 2 (28.6%) | 2 (66.7%)    |             |
| progressive disease          | 1       | 1 (11.1%)               | 0 (0%)     | 0 (0%)    | 0 (0%)    | 0 (0%)       |             |
